# Supplementary material for: Interaction between ZnO Nanoparticles and Albumin and Its Effect on Cytotoxicity, Cellular Uptake, Intestinal Transport, Toxicokinetics, and Acute Oral Toxicity
Source: MDPI journal article supplement (doi:10.3390/nano11112922), 2021-10-31
Supplement: s1 [file s1]

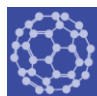

## Supplementary Materials

# Interaction between ZnO nanoparticles and albumin causes high cytotoxicity, cellular uptake, and intestinal transport, but does not cause acute oral toxicity

Eun-Been Jung, Jin Yu, and Soo-Jin Choi \*

Division of Applied Food System, Major of Food Science & Technology, Seoul Women's University, Seoul 01797, Republic of Korea; ky5031@swu.ac.kr (J.Y.); ebe2@swu.ac.kr (E.-B.J.); ky5031@swu.ac.kr (J.Y.)

\* Correspondence: sjchoi@swu.ac.kr; Tel.: +82-2-970-5634

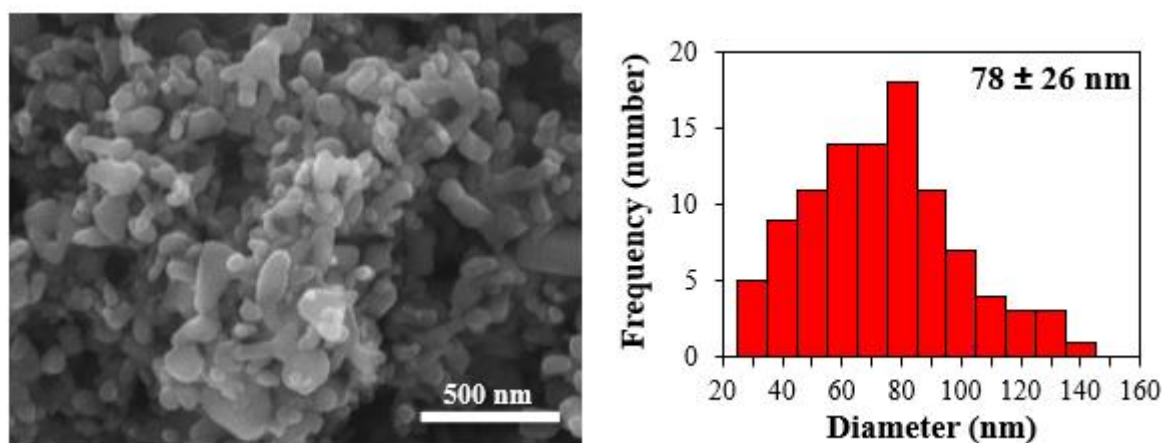

**Figure S1.** Scanning electron microscopy (SEM) images and size distribution of ZnO NPs. Particle size distribution was determined by randomly selecting more than 100 particles from the SEM images.

**Table S1.** Composition of artificial lysosomal fluid (ALF).

| pH  | Composition                    | Amounts/L |
|-----|--------------------------------|-----------|
| 4.5 | Sodium chloride                | 3.2 g/L   |
|     | Sodium hydroxide               | 6.0 g/L   |
|     | Citric acid                    | 20.8 g/L  |
|     | Calcium chloride dihydrate     | 128 mg/L  |
|     | Sodium phosphate               | 71 mg/L   |
|     | Sodium sulfate                 | 39 mg/L   |
|     | Magnesium chloride hexahydrate | 106 mg/L  |
|     | Glycerin                       | 59 mg/L   |
|     | Sodium citrate dihydrate       | 77 mg/L   |
|     | Sodium tartrate dihydrate      | 90 mg/L   |
|     | Sodium lactate                 | 52 mg/L   |
|     | Sodium pyruvate                | 86 mg/L   |
|     | Formaldehyde                   | 1 mL      |
|     | Glycine                        | 30.3 g/L  |

**Table S2.** Composition of simulated digestion fluids.

| Digestion fluids | pH        | Composition                           | Amounts/L |
|------------------|-----------|---------------------------------------|-----------|
| Saliva           | 6.8 ± 0.1 | α-amylase                             | 290 mg/L  |
|                  |           | Potassium chloride                    | 896 mg/L  |
|                  |           | Potassium thiocyanate                 | 200 mg/L  |
|                  |           | Mucin                                 | 25 mg/L   |
|                  |           | Sodium sulfate                        | 570 mg/L  |
|                  |           | Sodium chloride                       | 298 mg/L  |
|                  |           | Sodium phosphate monobasic dihydrate  | 1.1 g/L   |
|                  |           | Sodium bicarbonate                    | 1.7 g/L   |
|                  |           | Urea                                  | 200 mg/L  |
|                  |           | Uric acid                             | 15 mg/L   |
| Gastric fluid    | 1.3 ± 0.1 | Bovine serum albumin                  | 1 g/L     |
|                  |           | Calcium chloride dihydrate            | 400 mg/L  |
|                  |           | Glucosaminhydrochloride               | 330 mg/L  |
|                  |           | Glucose                               | 650 mg/L  |
|                  |           | Glucuronic acid                       | 20 mg/L   |
|                  |           | Potassium chloride                    | 824 mg/L  |
|                  |           | Mucin                                 | 3 g/L     |
|                  |           | Sodium chloride                       | 2.8 g/L   |
|                  |           | Sodium dihydrogen phosphate dihydrate | 333 mg/L  |
|                  |           | Pepsin                                | 2.5 g/L   |
| Duodenal fluid   | 8.1 ± 0.1 | Urea                                  | 85 mg/L   |
|                  |           | Bovine serum albumin                  | 1 g/L     |
|                  |           | Calcium chloride dihydrate            | 200 mg/L  |
|                  |           | Hydrogen chloride                     | 79 mg/L   |
|                  |           | Potassium chloride                    | 564 mg/L  |
|                  |           | Potassium dihydrogen phosphate        | 80 mg/L   |
|                  |           | Lipase                                | 1.5 g/L   |
|                  |           | Magnesium chloride                    | 22.7 mg/L |
|                  |           | Sodium chloride                       | 7 g/L     |
|                  |           | Sodium bicarbonate                    | 3.4 g/L   |
| Bile fluid       | 8.2 ± 0.1 | Pancreatin                            | 9 g/L     |
|                  |           | Urea                                  | 100 mg/L  |
|                  |           | Bile extract                          | 30 g/L    |
|                  |           | Bovine serum albumin                  | 1.8 g/L   |
|                  |           | Calcium chloride dihydrate            | 222 mg/L  |
|                  |           | Hydrogen chloride                     | 66 mg/L   |
|                  |           | Potassium chloride                    | 376 mg/L  |
|                  |           | Sodium chloride                       | 5.3 g/L   |
|                  |           | Sodium bicarbonate                    | 5.8 g/L   |
|                  |           | Urea                                  | 250 mg/L  |
